# Supplementary material for: Controlling gene expression timing through gene regulatory architecture
Source: PubMed Central journal article supplement (PMC8797265; doi:10.1371/journal.pcbi.1009745), 2022-01-18
Supplement: pcbi.1009745.s003.pdf [file pcbi.1009745.s003.pdf]

# Supporting information: Controlling gene expression timing through gene regulatory architecture

Md Zulfikar Ali<sup>1,2</sup>, Robert C. Brewster<sup>1,2\*</sup>

**1** Department of Systems Biology, University of Massachusetts Chan Medical School, Worcester, Massachusetts, USA.

**2** Department of Microbiology and Physiological Systems, University of Massachusetts Chan Medical School, Worcester, Massachusetts, USA.

\* Robert.Brewster@umassmed.edu

## S3 Text: Toy-model for power-law behavior

In order to determine the dependence of peak MFPT (response time for deterministic system) on regulatory strength ( $\alpha$ ) and TF-binding rate ( $k_{\text{off}}$ ), we probe a simple toy model of auto-regulation. In this model, we ignore the mRNA dynamics and also consider the binding and unbinding events are fast enough to attain quasi-static equilibrium. If there are  $x$  TF present at any time the probability that the gene is free ( $P_f$ ) or bound ( $P_b$ ) can be expressed as

$$P_f = \frac{k_{\text{off}}}{k_{\text{on}}x + k_{\text{off}}} = \frac{1}{\sigma x + 1}, \quad P_b = \frac{k_{\text{on}}x}{k_{\text{on}}x + k_{\text{off}}} = \frac{\sigma x}{\sigma x + 1}. \quad (1)$$

Here,  $\sigma = k_{\text{on}}/k_{\text{off}}$ . Now the rate of change of  $x$  can be expressed as

$$\begin{aligned} \frac{dx}{dt} &= r_0 P_f + r P_b - \gamma x, \\ &= r_0 \frac{1 + \alpha \sigma x}{1 + \sigma x} - \gamma x. \end{aligned} \quad (2)$$

$r_0$  and  $r$  being the basal production rate and production rate when TF is bound. The regulatory strength  $\alpha = r/r_0$  is same as previously defined. The above differential equation can be solved exactly to obtain,

$$\begin{aligned} \ln(C) - \gamma \sigma t &= A \ln(x - a - b) + B \ln(x - a + b), \\ a &= \frac{r_0 \alpha \sigma - \gamma}{2\gamma \sigma}, \quad b = \sqrt{a^2 + \frac{r_0}{\gamma \sigma}}, \\ A &= \frac{1 + \sigma(a + b)}{2b}, \quad B = \frac{-1 + \sigma(b - a)}{2b}. \end{aligned} \quad (3)$$

Here,  $\ln(C) = A \ln(-a - b) + B \ln(-a + b)$  is a constant of integration obtained using initial condition,  $x(t = 0) = 0$ . Furthermore the steady state expression  $x_{\text{ss}}$  is given by  $x_{\text{ss}} = a + b$  for  $t = \infty$ . The response time ( $\tau$ ), time to reach a certain fraction ( $f$ ) of  $x_{\text{ss}}$ , after doing a little bit algebra is expressed as

$$\tau = -\frac{\ln(1 - f)}{\gamma} + \frac{B}{\gamma \sigma} \left[ \ln(1 - f) - \ln\left(1 + f \frac{a + b}{b - a}\right) \right]. \quad (4)$$

Eqn. 4, is a non-monotonic function with a complex dependence on the threshold fraction ( $f$ ) and off-rate ( $k_{\text{off}} = k_{\text{on}}/\sigma$ ). The first term in the expression is basically the

response time for a constitutive gene,  $\tau_{\text{cons}} = -\ln(1 - f)/\gamma = \ln(2)/\gamma$  for  $f = 0.5$ . In principle, to obtain peak response time, one can maximize eqn. 4. However, in this case, cannot be solved explicitly. In Fig. 1, we show the results obtained using Eqn. 4 which closely match with the full deterministic model.

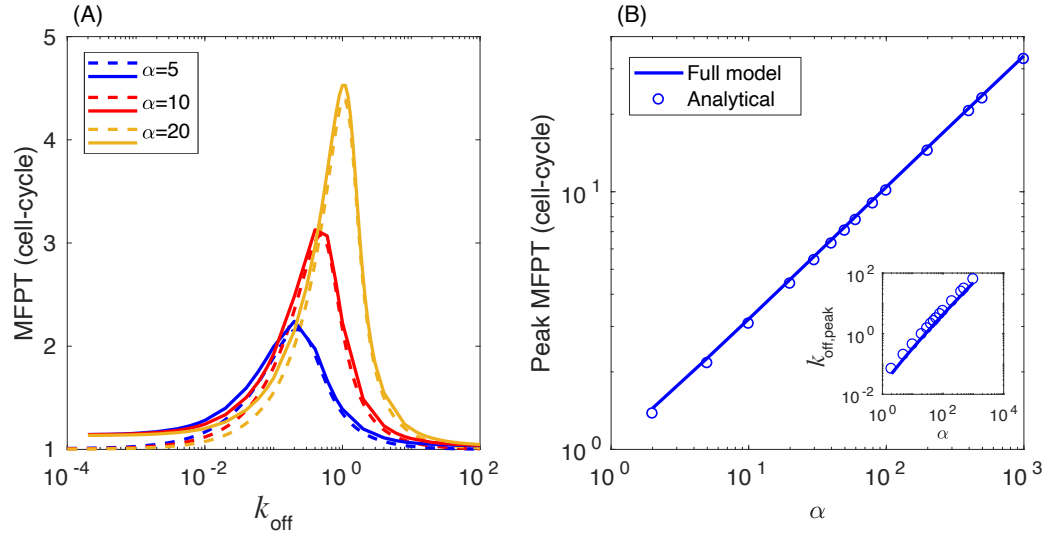

**Fig 1. Comparison of the full deterministic model and the simplified toy-model without mRNA dynamics.** (A) MFPT (response time) as a function of  $k_{\text{off}}$  from deterministic model (solid lines) and from Eqn. 4 for simplified toy-model for varying regulatory strengths ( $\alpha$ ). (B) Peak MFPT versus  $\alpha$  as well as  $k_{\text{off}}$  at peak versus  $\alpha$  (inset) from the toy-model matches well with the full deterministic model.
